# Supplementary material for: Overweight, Obesity, and Survival After Stroke in the Framingham Heart Study
Source: PubMed Central journal article supplement — J Am Heart Assoc. 2017 Jun 24;6(6):e004721. doi: 10.1161/JAHA.116.004721 (PMC5669145; doi:10.1161/jaha.116.004721), 2017-06-24

# **SUPPLEMENTAL MATERIAL**

**Table S1. Distributions of Ischemic Stroke Severity or Subtype by Composite BMI Category (18.5-<25 or ≥25)**

|                   | Interaction by<br>composite BMI<br>p-value | BMI 18.5-<25<br>n (%) | BMI ≥25<br>n (%) |
|-------------------|--------------------------------------------|-----------------------|------------------|
| Stroke severity   | 0.215                                      |                       |                  |
| None, no deficit  |                                            | 41 (21.5)             | 95 (21.0)        |
| Mild              |                                            | 69 (36.1)             | 177 (39.2)       |
| Moderate          |                                            | 43 (22.5)             | 109 (24.1)       |
| Severe            |                                            | 37 (19.4)             | 65 (14.4)        |
| Fatal             |                                            | 1 (0.5)               | 6 (1.3)          |
| Stroke subtype    | 0.719                                      |                       |                  |
| Cardioembolic     |                                            | 63 (31.2)             | 119 (25.0)       |
| Lacunar (ABI)     |                                            | 23 (11.4)             | 64 (13.5)        |
| ABI (non-lacunar) |                                            | 116 (57.4)            | 292 (61.5)       |

Abbreviations: BMI=body mass index. ABI=atherothrombotic brain infarction.

**Table S2. Causes of 10-Year Mortality for Ischemic Stroke Cases, All Stroke Cases, and Controls, by BMI Category**

|                                         | Cause of death |            |            |
|-----------------------------------------|----------------|------------|------------|
|                                         | CVD            | Cancer     | Other      |
| Ischemic stroke cases, n                | 228            | 49         | 105        |
| Proportion of ischemic stroke cases (%) | 59.7           | 12.8       | 27.5       |
| BMI category*, n (%)                    |                |            |            |
| Normal weight                           | 74 (32.5)      | 14 (28.6)  | 42 (40.0)  |
| Overweight                              | 96 (42.1)      | 21 (42.5)  | 37 (35.2)  |
| Obese                                   | 58 (25.4)      | 14 (28.6)  | 26 (24.8)  |
| All stroke cases, n                     | 337            | 58         | 129        |
| Proportion of all stroke cases (%)      | 64.3           | 11.1       | 24.6       |
| BMI category (%)                        |                |            |            |
| Normal weight                           | 111 (32.9)     | 16 (27.6)  | 51 (39.5)  |
| Overweight                              | 147 (43.6)     | 27 (46.6)  | 49 (38.0)  |
| Obese                                   | 79 (23.4)      | 15 (25.9)  | 29 (22.5)  |
| Controls, n                             | 362            | 234        | 383        |
| Proportion of controls (%)              | 37.0           | 23.9       | 39.1       |
| BMI category (%)                        |                |            |            |
| Normal weight                           | 109 (30.1)     | 63 (26.9)  | 144 (37.6) |
| Overweight                              | 163 (45.0)     | 109 (46.6) | 161 (42.0) |
| Obese                                   | 90 (24.9)      | 62 (26.5)  | 78 (20.4)  |

Abbreviations: CVD=cardiovascular disease. BMI=body mass index.

\*Normal weight=BMI 18.5-<25. Overweight=BMI 25-<30. Obese=BMI  $\geq$ 30.

**Table S3. Mortality by BMI or BMI Category among All Stroke Cases and Controls, Model 1\***

|                              | Case-control interaction | All stroke cases                 |                   |         | Controls                         |                   |         |
|------------------------------|--------------------------|----------------------------------|-------------------|---------|----------------------------------|-------------------|---------|
|                              |                          | 439/664 (66.1)                   |                   |         | 824/1919 (42.9)                  |                   |         |
| Mortality (%)                | p-value                  | 10-yr cumulative hazard (95% CI) | 10-yr HR (95% CI) | p-value | 10-yr cumulative hazard (95% CI) | 10-yr HR (95% CI) | p-value |
| LBMI                         | 0.307                    | n/a                              | 0.61 (0.32,1.17)  | 0.136   | n/a                              | 0.87 (0.53,1.41)  | 0.565   |
| BMI category <sup>†</sup>    | 0.279                    |                                  |                   |         |                                  |                   |         |
| Normal weight                |                          | 1.36 (1.14,1.61)                 | 1.0               |         | 0.53 (0.46,0.67)                 | 1.0               |         |
| Overweight                   |                          | 1.03 (0.88,1.20)                 | 0.76 (0.61,0.95)  | 0.015   | 0.46 (0.41,0.52)                 | 0.88 (0.75,1.04)  | 0.123   |
| Obese                        |                          | 1.14 (0.94,1.39)                 | 0.84 (0.65,1.09)  | 0.189   | 0.55 (0.47,0.64)                 | 1.04 (0.86,1.26)  | 0.669   |
| Composite BMI                | 0.130                    |                                  |                   |         |                                  |                   |         |
| 18.5-<25                     |                          | 1.36 (1.14,1.62)                 | 1.0               |         | 0.53 (0.47,0.60)                 | 1.0               |         |
| ≥25                          |                          | 1.07 (0.94,1.21)                 | 0.79 (0.64,0.97)  | 0.022   | 0.49 (0.45,0.54)                 | 0.93 (0.80,1.08)  | 0.342   |
| BMI subcategory <sup>†</sup> | 0.294                    |                                  |                   |         |                                  |                   |         |
| Normal weight                |                          | 1.36 (1.14,1.62)                 | 1.0               |         | 0.61 (0.49,0.75)                 | 1.0               |         |
| Low overweight               |                          | 1.04 (0.85,1.27)                 | 0.76 (0.59,0.99)  | 0.038   | 0.51 (0.41,0.62)                 | 0.95 (0.79,1.13)  | 0.531   |
| High overweight              |                          | 1.01 (0.80,1.28)                 | 0.74 (0.56,0.99)  | 0.043   | 0.41 (0.34,0.49)                 | 0.78 (0.63,0.96)  | 0.022   |
| Low obesity                  |                          | 0.94 (0.70,1.25)                 | 0.69 (0.50,0.96)  | 0.027   | 0.50 (0.43,0.57)                 | 0.96 (0.76,1.21)  | 0.738   |
| High Obesity                 |                          | 1.41 (1.08,1.85)                 | 1.04 (0.76,1.42)  | 0.824   | 0.53 (0.46,0.60)                 | 1.15 (0.90,1.47)  | 0.264   |

Abbreviations: BMI=body mass index. HR=hazard ratio. CI=confidence interval. LBMI=natural log-transformed body mass index.

\*Adjusted for age, sex, time between exam and event date, education, marital status, and smoking.

<sup>†</sup>Normal weight=BMI 18.5-<25. Overweight=BMI 25-<30. Obese=BMI ≥30. Low overweight=BMI 25-<27.5. High overweight=BMI 27.5-<30. Low obesity=BMI 30-<32.5. High obesity=BMI ≥32.5.

**Table S4. Mortality by BMI or BMI Category among Ischemic Stroke Cases and Controls, Model 2\***

| Mortality (%)             | Ischemic stroke cases |         | Controls         |         |
|---------------------------|-----------------------|---------|------------------|---------|
|                           | 304/484 (62.8)        |         | 580/1396 (41.5)  |         |
|                           | HR (95% CI)           | p-value | HR (95% CI)      | p-value |
| LBMI                      | 0.89 (0.40,1.97)      | 0.769   | 0.75 (0.41,1.34) | 0.326   |
| BMI category <sup>†</sup> |                       |         |                  |         |
| Normal weight             | 1.0                   |         | 1.0              |         |
| Overweight                | 0.77 (0.58,1.01)      | 0.057   | 0.93 (0.77,1.14) | 0.491   |
| Obese                     | 0.91 (0.66,1.25)      | 0.545   | 1.02 (0.81,1.28) | 0.896   |
| Composite BMI             |                       |         |                  |         |
| 18.5-<25                  | 1.0                   |         | 1.0              |         |
| ≥25                       | 0.81 (0.63,1.05)      | 0.106   | 0.96 (0.80,1.15) | 0.653   |
| BMI subcategory           |                       |         |                  |         |
| Normal weight             | 1.0                   |         | 1.0              |         |
| Low overweight            | 0.77 (0.57,1.05)      | 0.093   | 1.03 (0.83,1.28) | 0.093   |
| High overweight           | 0.76 (0.53,1.08)      | 0.120   | 0.79 (0.61,1.02) | 0.069   |
| Low obesity               | 0.66 (0.43,0.99)      | 0.047   | 0.93 (0.70,1.23) | 0.619   |
| High obesity              | 1.27 (0.87,1.85)      | 0.222   | 1.13 (0.84,1.52) | 0.432   |

Abbreviations: BMI=body mass index. HR=Hazard Ratio. CI=confidence interval. LBMI=natural log-transformed body mass index.

\*Adjusted for age, sex, time between exam and event date, education, marital status, smoking, systolic blood pressure, diabetes mellitus, atrial fibrillation, heart failure, coronary heart disease, prevalent cancer, and dementia.

<sup>†</sup>Normal weight=BMI 18.5-<25. Overweight=BMI 25-<30. Obese=BMI ≥30. Low overweight=BMI 25-<27.5. High overweight=BMI 27.5-<30. Low obesity=BMI 30-<32.5. High obesity=BMI ≥32.5.

**Table S5. Mortality by BMI or BMI Category among Ischemic Stroke Cases and Controls, Excluding Participants with Weight Loss from the Normal Weight Group\***

| Mortality (%)                | Case-control interaction | Ischemic stroke cases            |                   |         | Controls                         |                   |         |
|------------------------------|--------------------------|----------------------------------|-------------------|---------|----------------------------------|-------------------|---------|
|                              |                          | 241/343 (70.3)                   |                   |         | 440/972 (45.3)                   |                   |         |
|                              | p-value                  | 10-yr cumulative hazard (95% CI) | 10-yr HR (95% CI) | p-value | 10-yr cumulative hazard (95% CI) | 10-yr HR (95% CI) | p-value |
| LBMI                         | 0.731                    | n/a                              | 0.71 (0.29,1.73)  | 0.451   | n/a                              | 0.80 (0.42,1.53)  | 0.502   |
| BMI category <sup>†</sup>    | 0.579                    |                                  |                   |         |                                  |                   |         |
| Stable normal weight         |                          | 1.53 (1.20,1.95)                 | 1.0               |         | 0.56 (0.47,0.67)                 | 1.0               |         |
| Overweight                   |                          | 1.11 (0.90,1.37)                 | 0.72 (0.53,0.99)  | 0.041   | 0.55 (0.48,0.64)                 | 0.99 (0.79,1.24)  | 0.923   |
| Obese                        |                          | 1.27 (0.96,1.66)                 | 0.83 (0.58,1.19)  | 0.308   | 0.58 (0.47,0.72)                 | 1.04 (0.79,1.37)  | 0.771   |
| Composite BMI                | 0.350                    |                                  |                   |         |                                  |                   |         |
| 18.5-<25                     |                          | 1.53 (1.20,1.95)                 | 1.0               |         | 0.56 (0.47,0.67)                 | 1.0               |         |
| ≥25                          |                          | 1.16 (0.98,1.38)                 | 0.76 (0.57,1.01)  | 0.058   | 0.56 (0.50,0.64)                 | 1.01 (0.82,1.24)  | 0.965   |
| BMI subcategory <sup>†</sup> | 0.101                    |                                  |                   |         |                                  |                   |         |
| Stable normal weight         |                          | 1.52 (1.20,1.95)                 | 1.0               |         | 0.56 (0.47,0.67)                 | 1.0               |         |
| Low overweight               |                          | 1.02 (0.78,1.34)                 | 0.67 (0.47,0.95)  | 0.025   | 0.63 (0.52,0.75)                 | 1.12 (0.88,1.43)  | 0.356   |
| High overweight              |                          | 1.23 (0.91,1.65)                 | 0.81 (0.55,1.18)  | 0.261   | 0.44 (0.34,0.57)                 | 0.79 (0.59,1.07)  | 0.123   |
| Low obesity                  |                          | 0.92 (0.59,1.42)                 | 0.60 (0.37,0.99)  | 0.044   | 0.48 (0.34,0.66)                 | 0.85 (0.59,1.23)  | 0.398   |
| High Obesity                 |                          | 1.64 (1.16,2.32)                 | 1.08 (0.71,1.63)  | 0.731   | 0.69 (0.52,0.90)                 | 1.23 (0.89,1.70)  | 0.213   |

Abbreviations: BMI=body mass index. HR=hazard ratio. CI=confidence interval. LBMI=natural log-transformed body mass index.

\*Sensitivity analysis adjusted for age, sex, time between exam and event date, education, marital status, and smoking.

<sup>†</sup>Stable normal weight=BMI 18.5-<25 on two exams within 5-10 years. Overweight=BMI 25-<30. Obese=BMI ≥30. Low overweight=BMI 25-<27.5. High overweight=BMI 27.5-<30. Low obesity=BMI 30-<32.5. High obesity=BMI ≥32.5.

**Table S6. Mortality by BMI or BMI Category among All Stroke Cases and Controls, Excluding Participants with Weight Loss from the Normal Weight Group\***

| Mortality (%)             | Case-control interaction | All stroke cases                 |                   |         | Controls                         |                   |         |
|---------------------------|--------------------------|----------------------------------|-------------------|---------|----------------------------------|-------------------|---------|
|                           |                          | 316/458 (69.0)                   |                   |         | 591/1304 (45.3)                  |                   |         |
|                           | p-value                  | 10-yr cumulative hazard (95% CI) | 10-yr HR (95% CI) | p-value | 10-yr cumulative hazard (95% CI) | 10-yr HR (95% CI) | p-value |
| LBMI                      | 0.701                    | n/a                              | 0.65 (0.30,1.41)  | 0.271   | n/a                              | 0.97 (0.55,1.72)  | 0.919   |
| BMI category <sup>†</sup> | 0.611                    |                                  |                   |         |                                  |                   |         |
| Stable normal weight      |                          | 1.39 (1.11,1.73)                 | 1.0               |         | 0.54 (0.46,0.64)                 | 1.0               |         |
| Overweight                |                          | 1.09 (0.91,1.31)                 | 0.79 (0.60,1.04)  | 0.091   | 0.55 (0.49,0.63)                 | 1.02 (0.84,1.24)  | 0.871   |
| Obese                     |                          | 1.21 (0.96,1.53)                 | 0.87 (0.64,1.20)  | 0.405   | 0.58 (0.49,0.69)                 | 1.06 (0.84,1.35)  | 0.601   |
| Composite BMI             | 0.351                    |                                  |                   |         |                                  |                   |         |
| 18.5-<25                  |                          | 1.39 (1.11,1.74)                 | 1.0               |         | 0.55 (0.46,0.64)                 | 1.0               |         |
| ≥25                       |                          | 1.13 (0.98,1.31)                 | 0.82 (0.63,1.06)  | 0.124   | 0.56 (0.51,0.63)                 | 1.03 (0.86,1.24)  | 0.745   |
| BMI subcategory           | 0.718                    |                                  |                   |         |                                  |                   |         |
| Stable normal weight      |                          | 1.39 (1.11,1.74)                 | 1.0               |         | 0.55 (0.46,0.64)                 | 1.0               |         |
| Low overweight            |                          | 1.10 (0.88,1.37)                 | 0.79 (0.58,1.07)  | 0.130   | 0.59 (0.50,0.68)                 | 1.07 (0.87,1.33)  | 0.511   |
| High overweight           |                          | 1.08 (0.83,1.41)                 | 0.78 (0.55,1.10)  | 0.152   | 0.50 (0.41,0.61)                 | 0.92 (0.71,1.18)  | 0.501   |
| Low obesity               |                          | 1.09 (0.80,1.50)                 | 0.79 (0.53,1.16)  | 0.219   | 0.53 (0.42,0.67)                 | 0.97 (0.74,1.29)  | 0.852   |
| High obesity              |                          | 1.38 (0.99,1.91)                 | 0.99 (0.67,1.46)  | 0.957   | 0.65 (0.51,0.85)                 | 1.20 (0.89,1.62)  | 0.239   |

Abbreviations: BMI=body mass index. HR=hazard ratio. CI=confidence interval. LBMI=natural log-transformed body mass index.

\*Sensitivity analysis adjusted for age, sex, time between exam and event date, education, marital status, and smoking.

<sup>†</sup>Stable normal weight=BMI 18.5-<25 on two exams within 5-10 years. Overweight=BMI 25-<30. Obese=BMI ≥30. Low overweight=BMI 25-<27.5. High overweight=BMI 27.5-<30. Low obesity=BMI 30-<32.5. High obesity=BMI ≥32.5.

**Table S7. One Year Mortality by BMI or BMI Category among Ischemic Stroke Cases and Controls\***

| Mortality (%)             | Ischemic stroke cases |         | Controls          |         |
|---------------------------|-----------------------|---------|-------------------|---------|
|                           | 125/579 (21.5)        |         | 61/1649 (3.7)     |         |
|                           | HR (95% CI)           | p-value | HR (95% CI)       | p-value |
| LBMI                      | 1.09 (0.35-3.44)      | 0.884   | 0.45 (0.080,2.53) | 0.363   |
| BMI category <sup>†</sup> |                       |         |                   |         |
| Normal weight             | 1.0                   |         | 1.0               |         |
| Overweight                | 0.78 (0.51,1.21)      | 0.270   | 0.99 (0.55,1.75)  | 0.960   |
| Obese                     | 0.99 (0.62,1.60)      | 0.981   | 0.80 (0.38,1.69)  | 0.558   |
| Composite BMI             |                       |         |                   |         |
| 18.5-<25                  | 1.0                   |         | 1.0               |         |
| ≥25                       | 0.86 (0.58,1.27)      | 0.446   | 0.93 (0.54,1.60)  | 0.785   |
| BMI subcategory           |                       |         |                   |         |
| Normal weight             | 1.0                   |         | 1.0               |         |
| Low overweight            | 0.79 (0.48,1.30)      | 0.359   | 1.06 (0.57,1.99)  | 0.845   |
| High overweight           | 0.77 (0.45,1.34)      | 0.359   | 0.85 (0.38,1.87)  | 0.675   |
| Low obesity               | 0.83 (0.45,1.52)      | 0.548   | 0.81 (0.33,2.04)  | 0.661   |
| High obesity              | 1.19 (0.67,2.10)      | 0.556   | 0.78 (0.29,2.10)  | 0.623   |

Abbreviations: BMI=body mass index. HR=hazard ratio. CI=confidence interval. LBMI=natural log-transformed body mass index.

\*Adjusted for age, sex, time between exam and event date, education, marital status, and smoking.

<sup>†</sup>Normal weight=BMI 18.5-<25. Overweight=BMI 25-<30. Obese=BMI ≥30. Low overweight=BMI 25-<27.5. High overweight=BMI 27.5-<30. Low obesity=BMI 30-<32.5. High obesity=BMI ≥32.5



**Figure S1.** Selection of study participants; Abbreviations: FHS=Framingham Heart Study. BMI=body mass index.

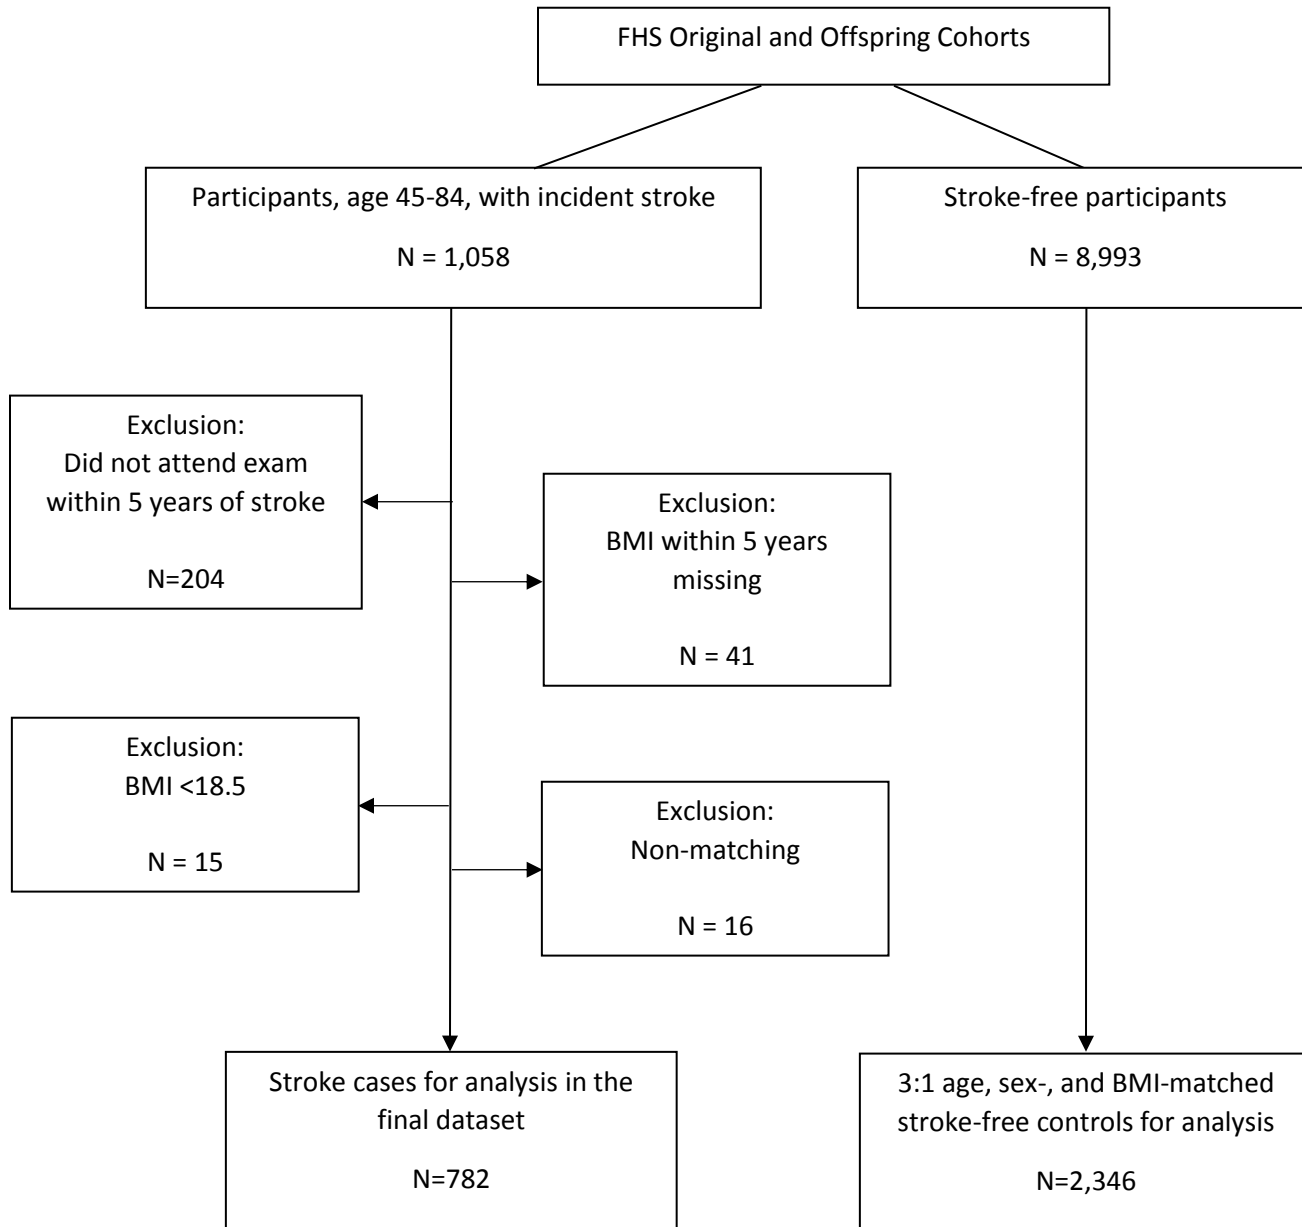

Supplement: JAH3-6-e004721-s001.pdf [file JAH3-6-e004721-s001.pdf]
